# Supplementary material for: Unique Extracellular Matrix Remodeling in Hepatocellular Carcinoma: TP53 GOF- SP1-ADAM9 Axis as a Prognostic and Therapeutic Target
Source: Research Square preprint supplement (doi:10.21203/rs.3.rs-8749587/v1), 2026-02-06
Supplement: Supplementary file 1 [file 47785f082ba4e326a6d4ff67.docx]

**Supplementary Material for Review**


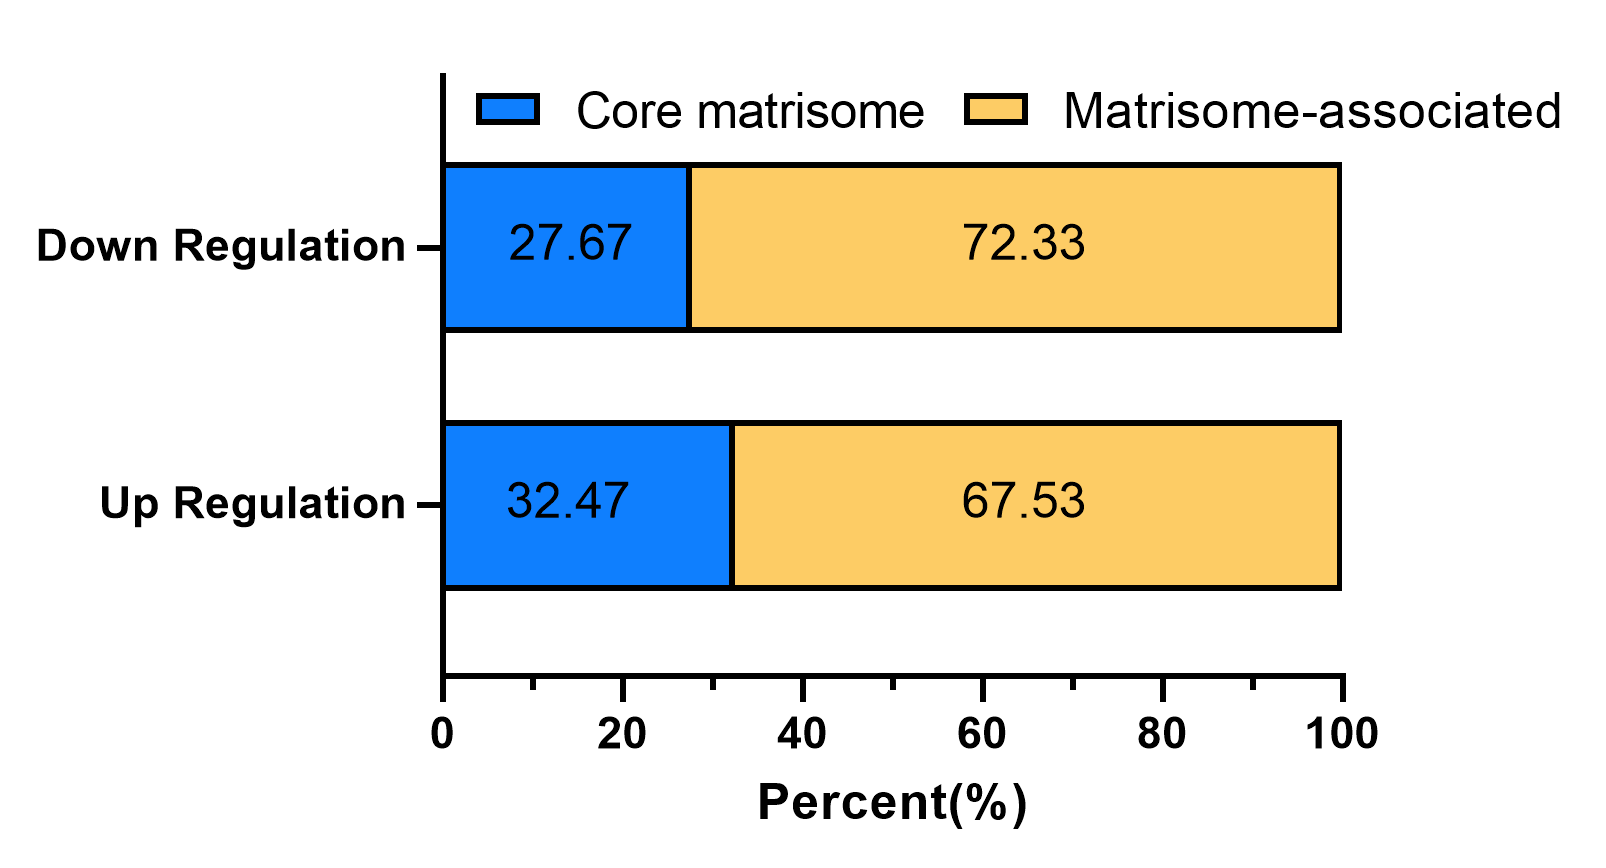


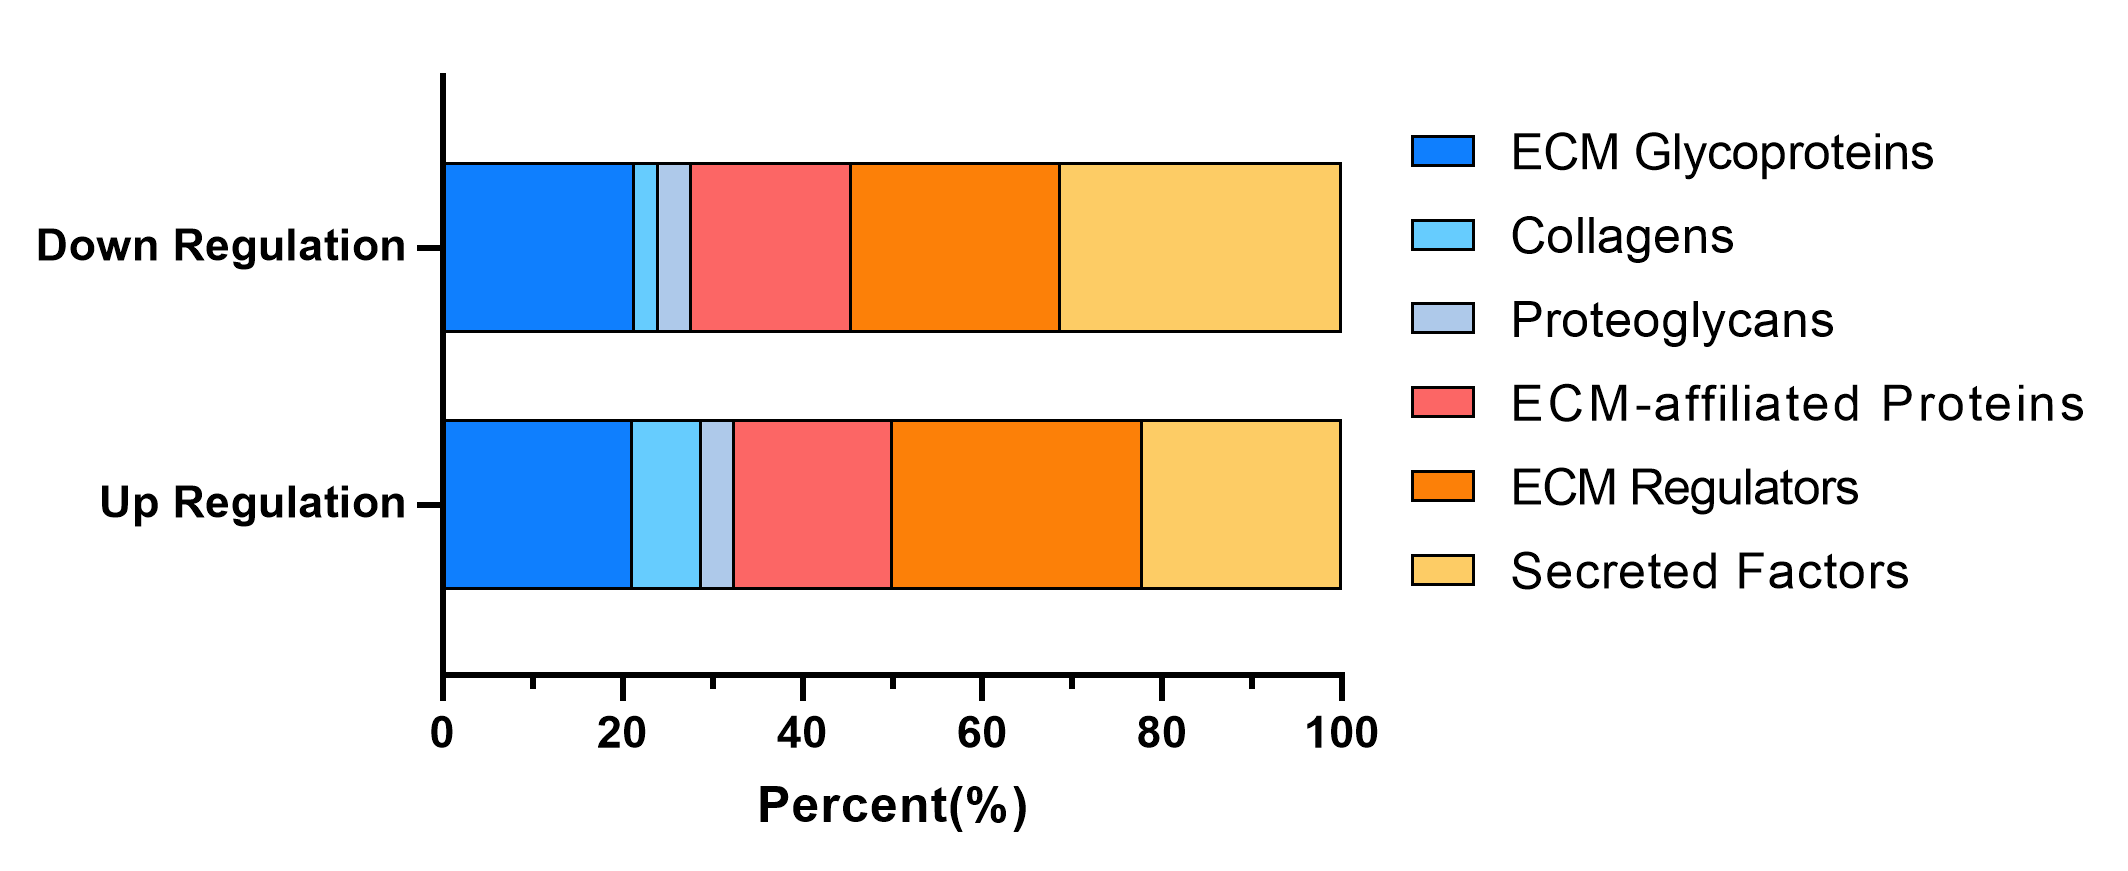


**Supplementary Figure 1.** The components of ECM upregulation and downregulation change with tumor development in the TCGA cohort.


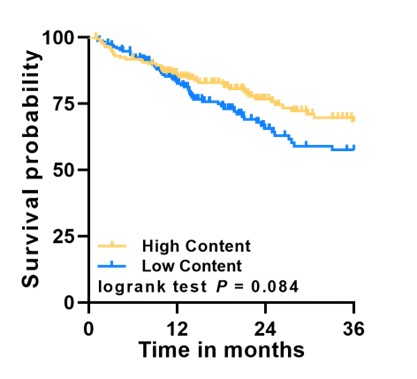


**Supplementary Figure 2.** The TCGA patient cohort was divided into high and low groups according to the tumor ECM content, and the survival curve was plotted.


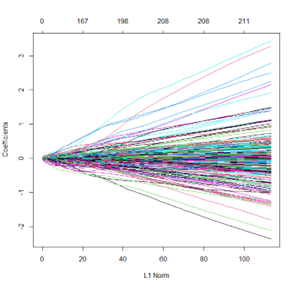

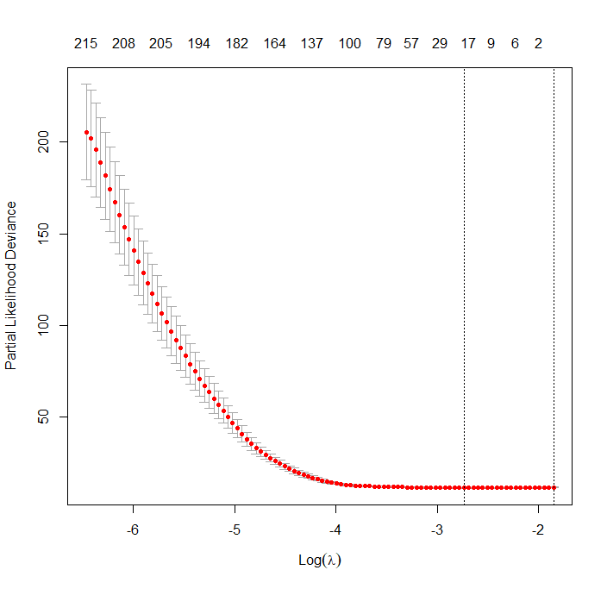


**Supplementary Figure 3.** 371 cases of HCC patients were used to construct a prognostic model based on the LASSO regression algorithm.


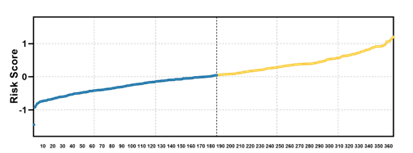

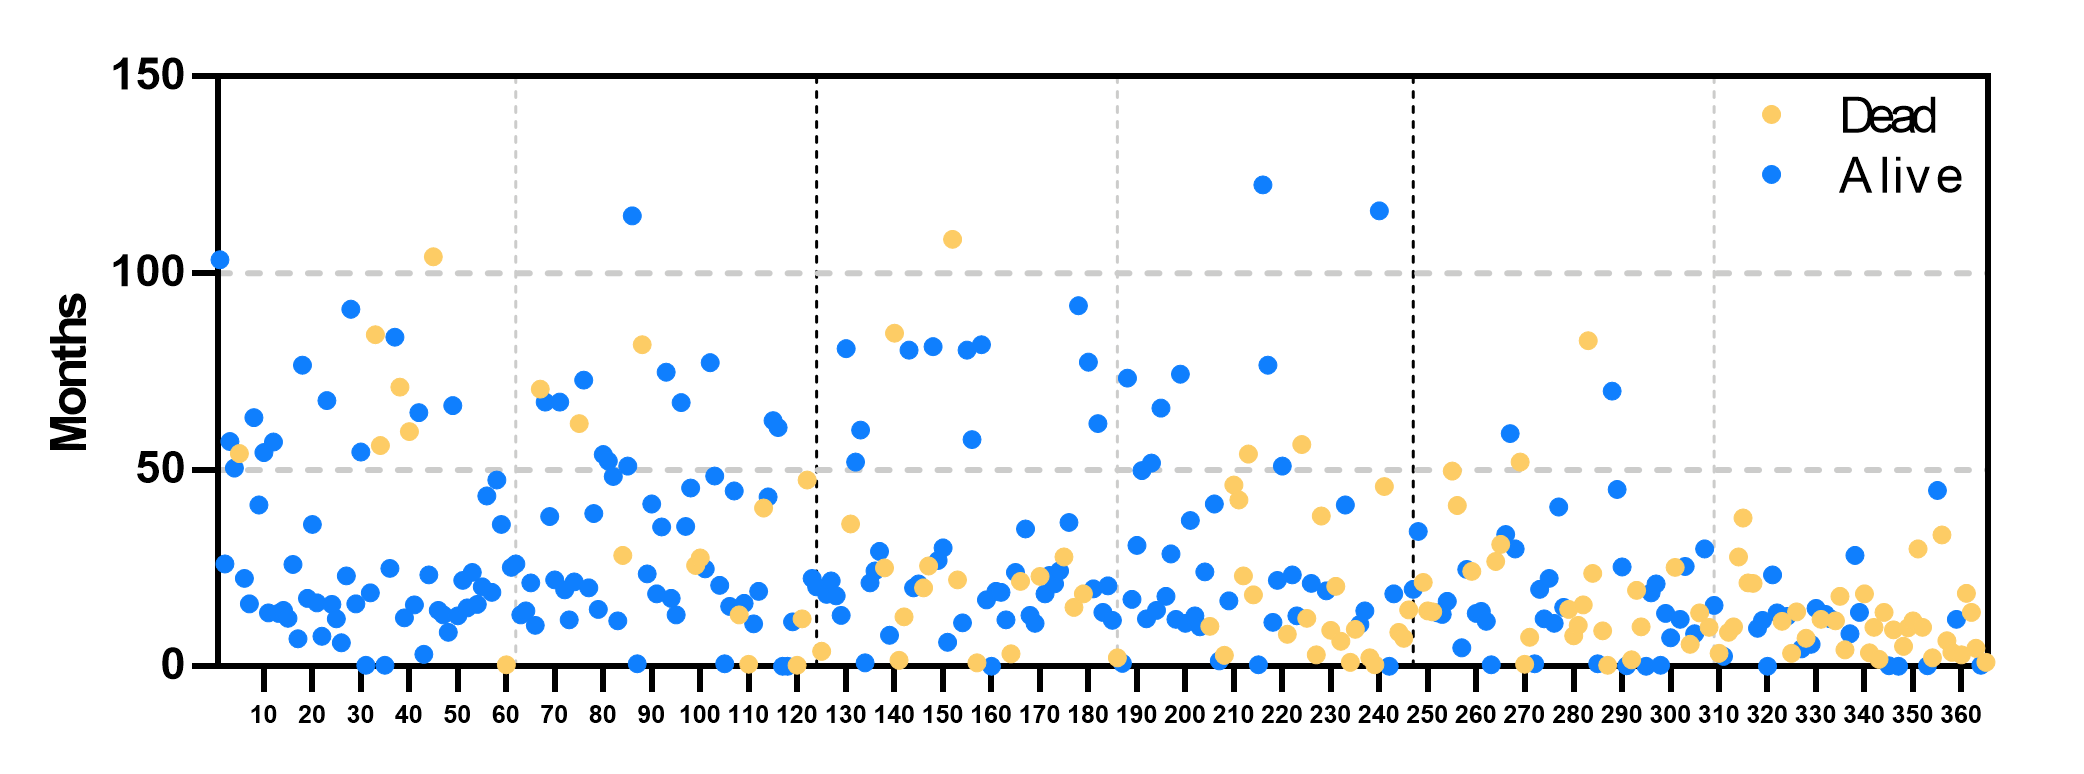


**Supplementary Figure 4.** The survival of 371 HCC patients gradually deteriorated with the increase of risk score.

**Supplementary Figure 5.** ROC analysis of ECM related gene signature for prediction of recurrence risk at 1, 3, and 5 years in TCGA cohort.


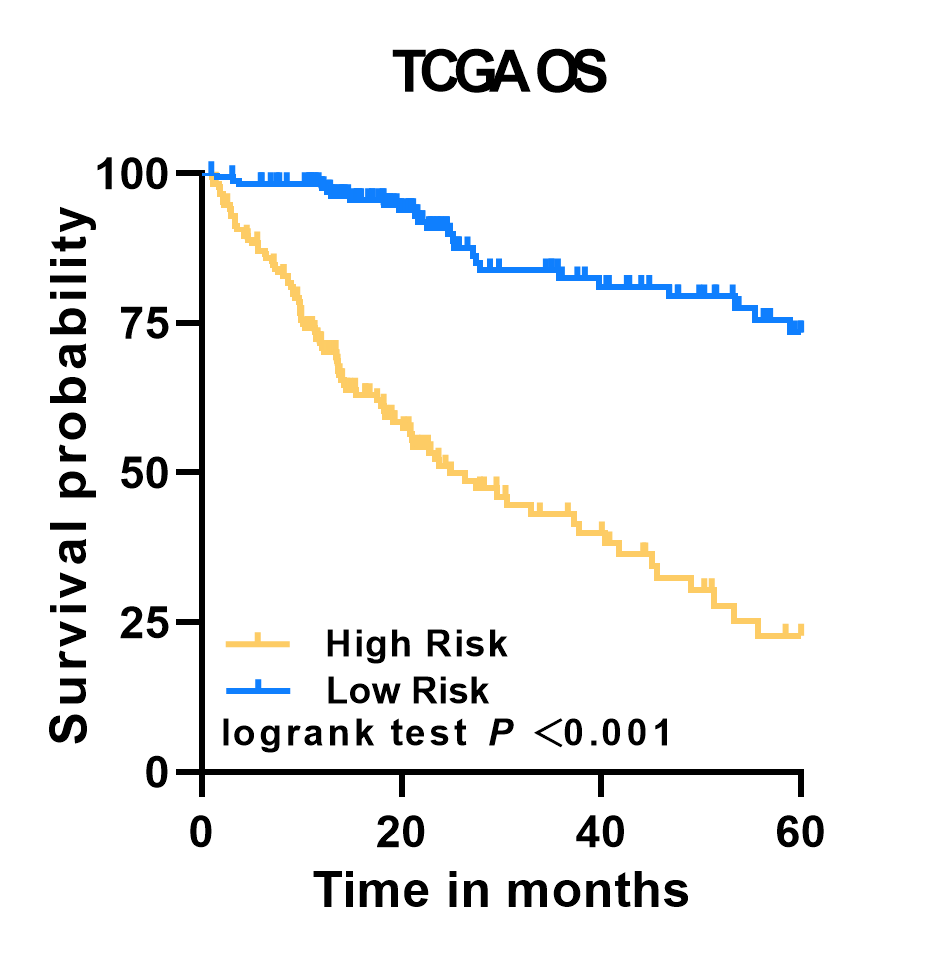

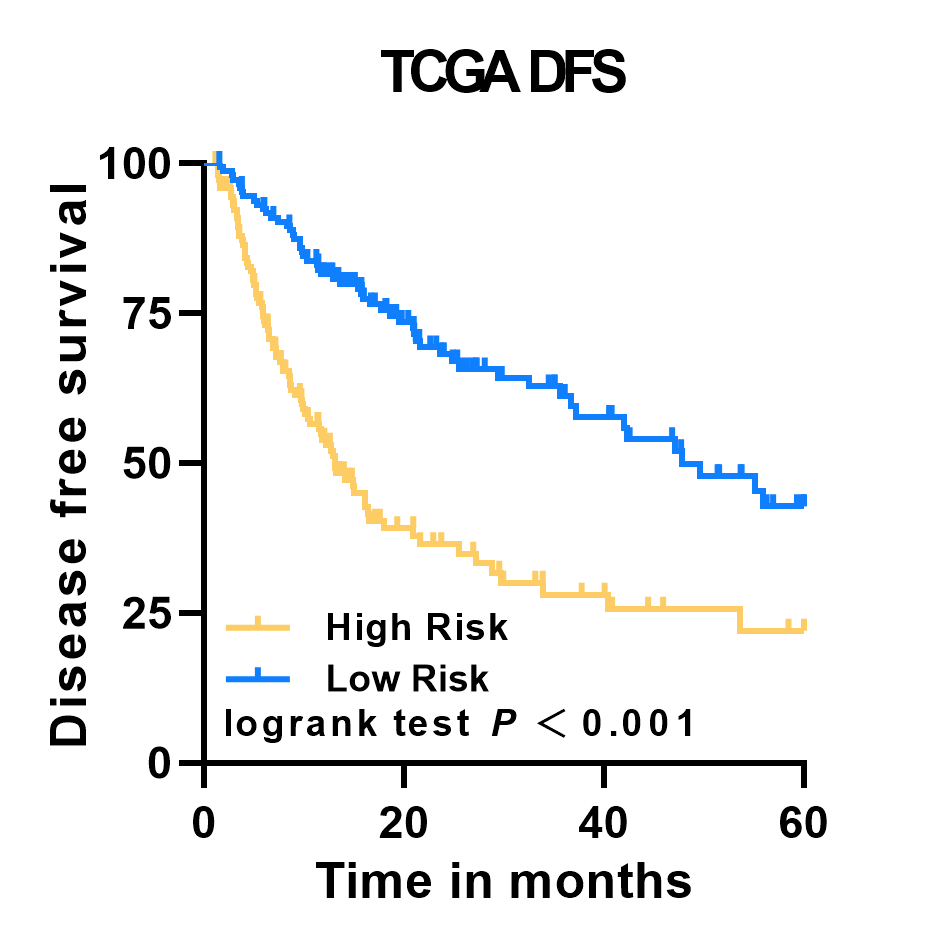


**Supplementary Figure 6.** Kaplan-Meier curves of survival probability and disease free survival in all TCGA patients with HCC based on risk score.


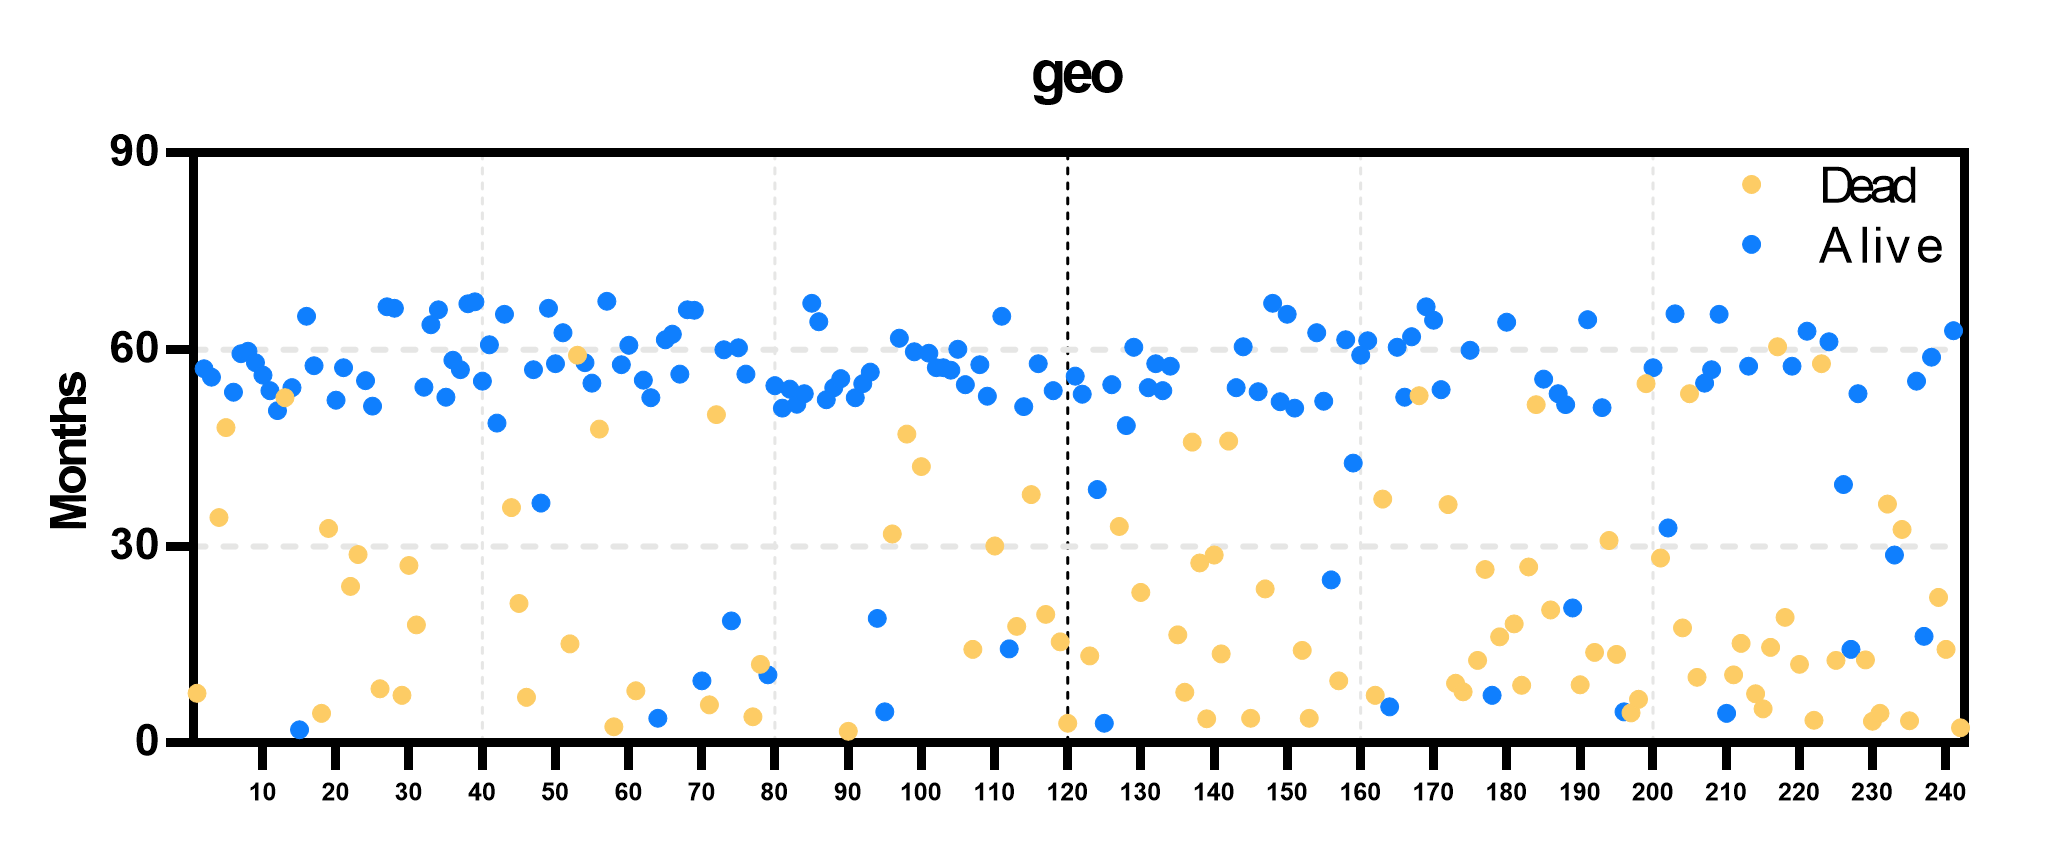


**GEO140520**


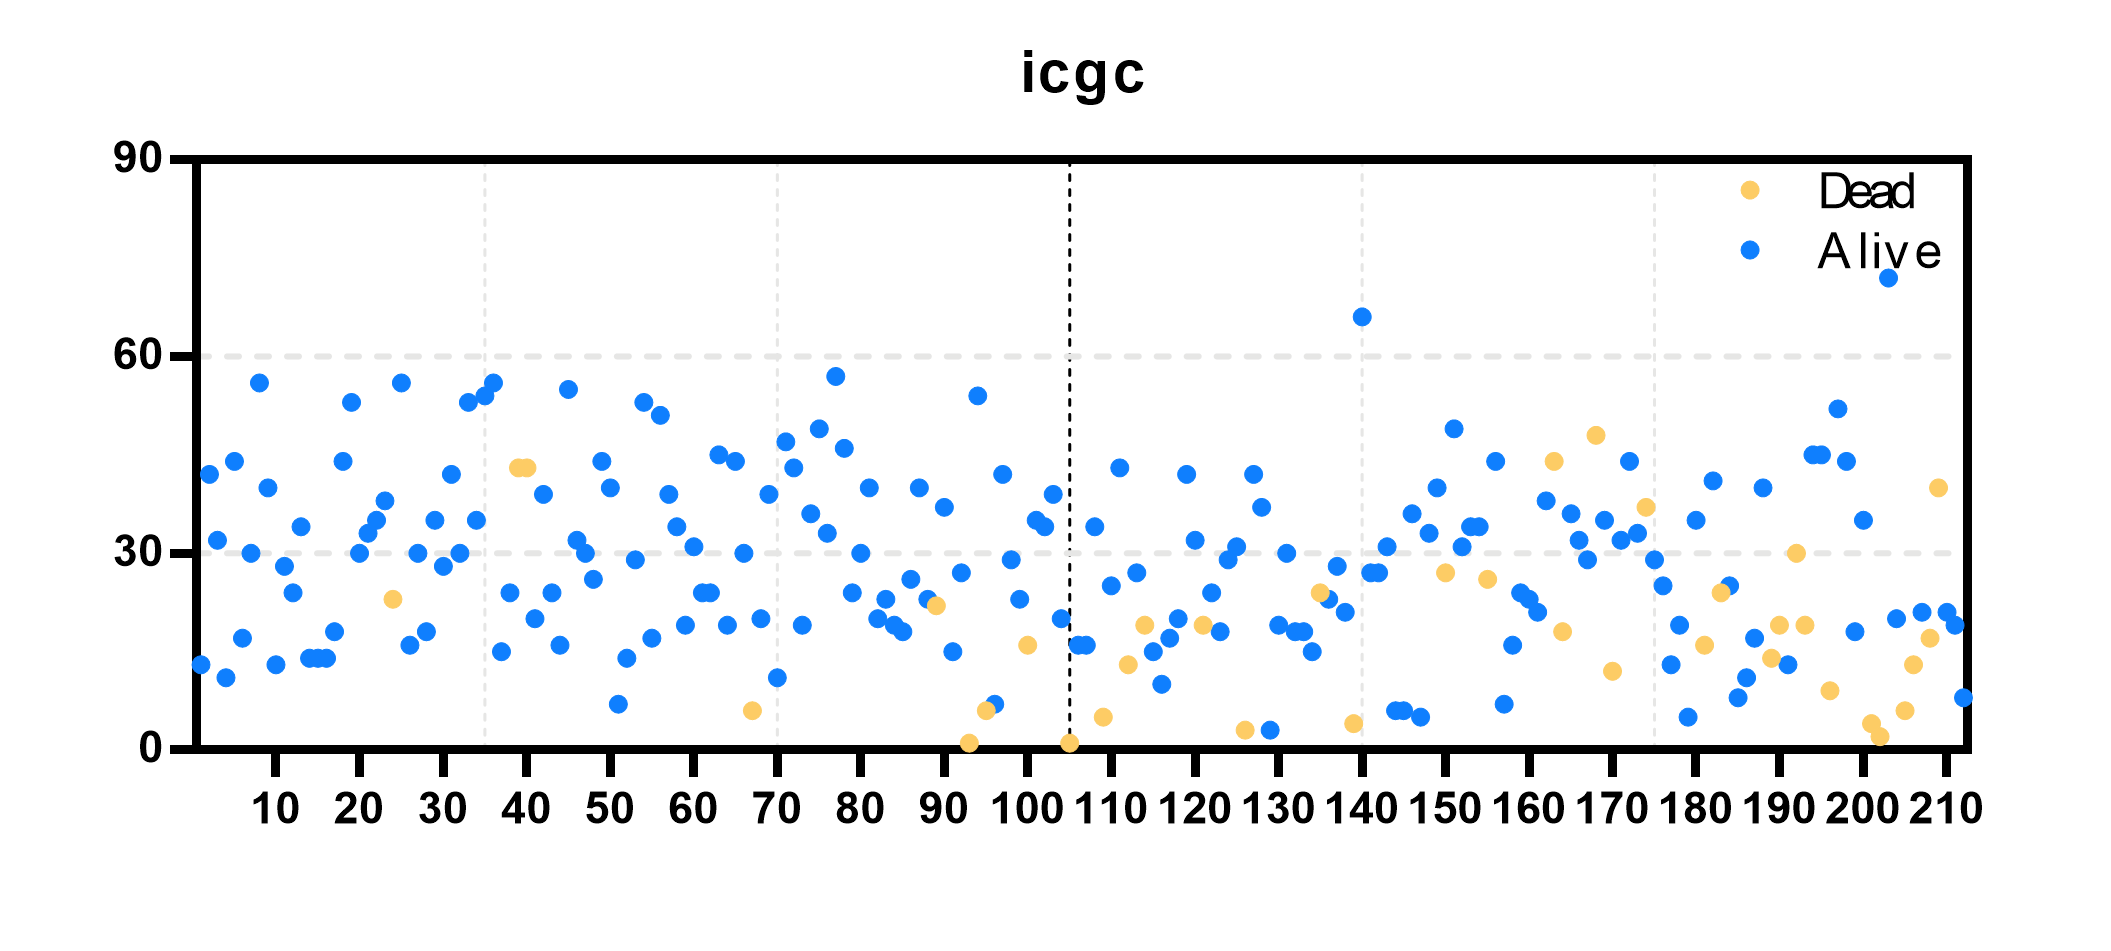


**ICGC**


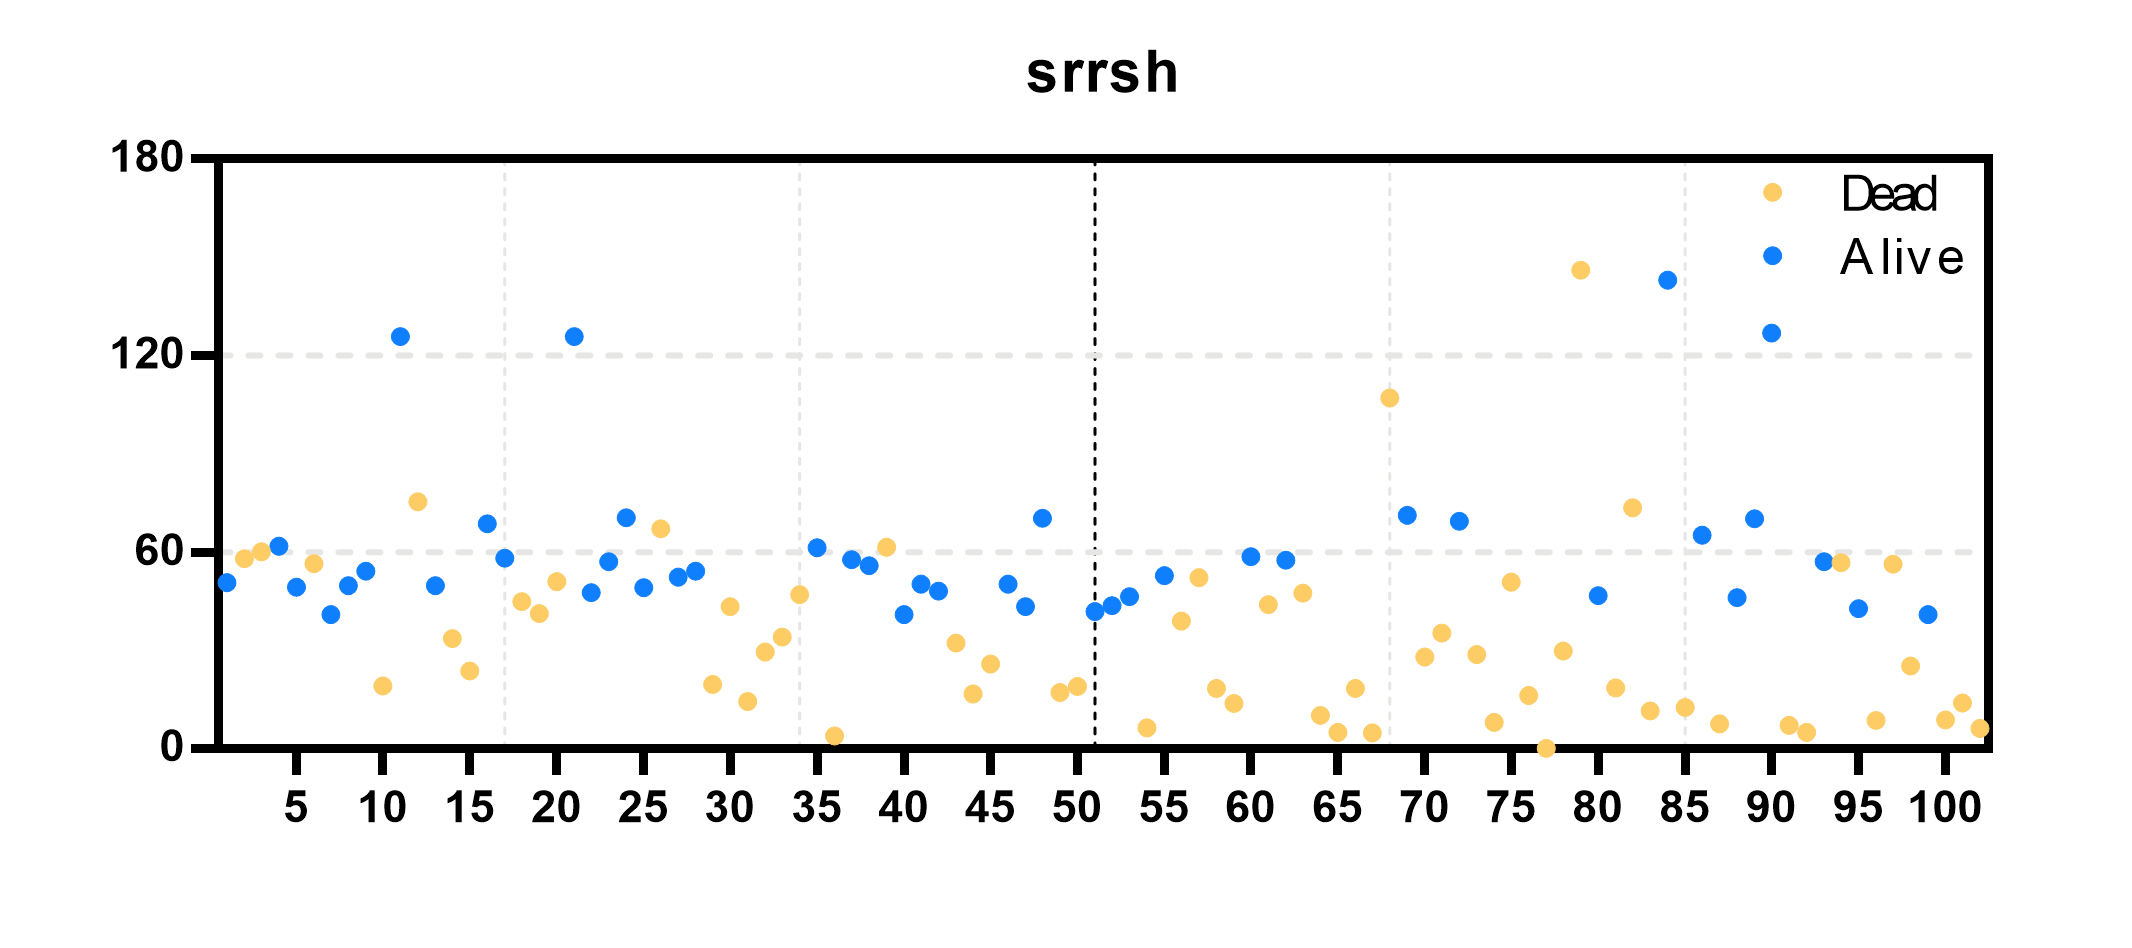


**SRRSH**

**Supplementary Figure 7.** The survival of HCC patients in the GEO, ICGC and SRRSH cohorts gradually deteriorated with the increase of risk scores.


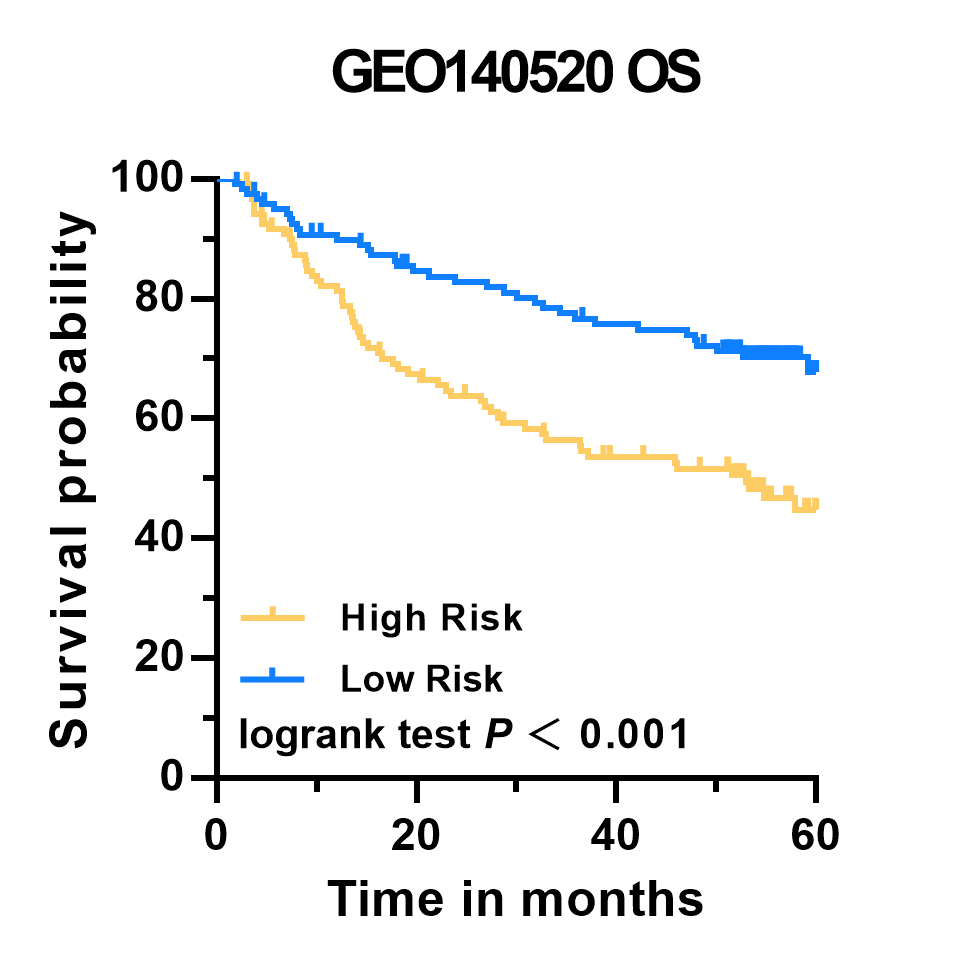

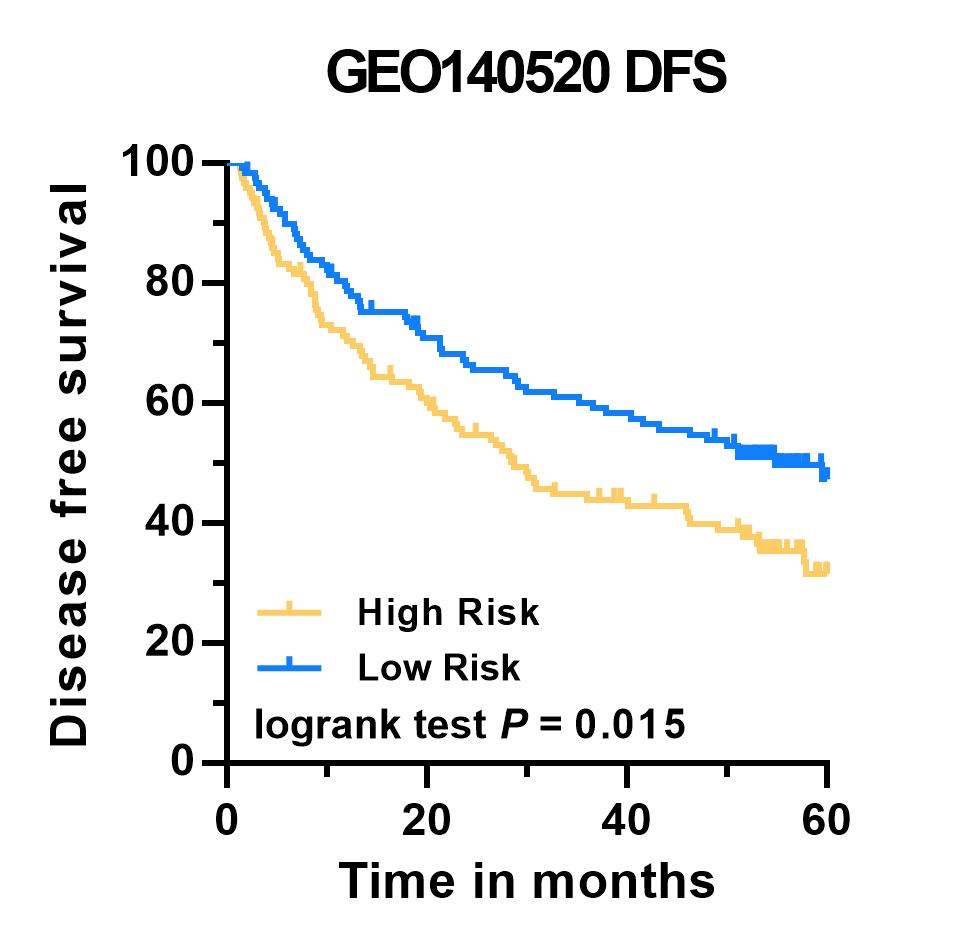


**Supplementary Figure 8.** Kaplan-Meier curves of survival probability and disease free survival in all GEO140520 cohort patients with HCC based on risk score.


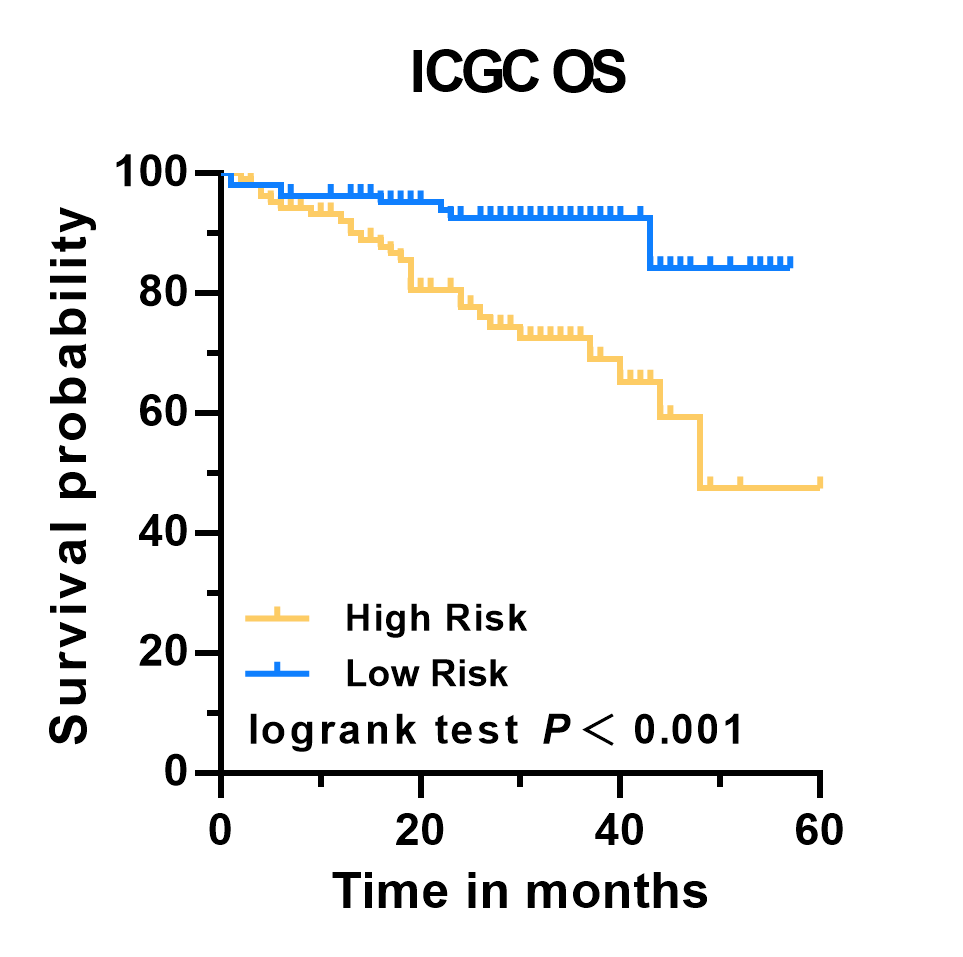


**Supplementary Figure 9.** Kaplan-Meier curves of survival probability in all ICGC cohort patients with HCC based on risk score.


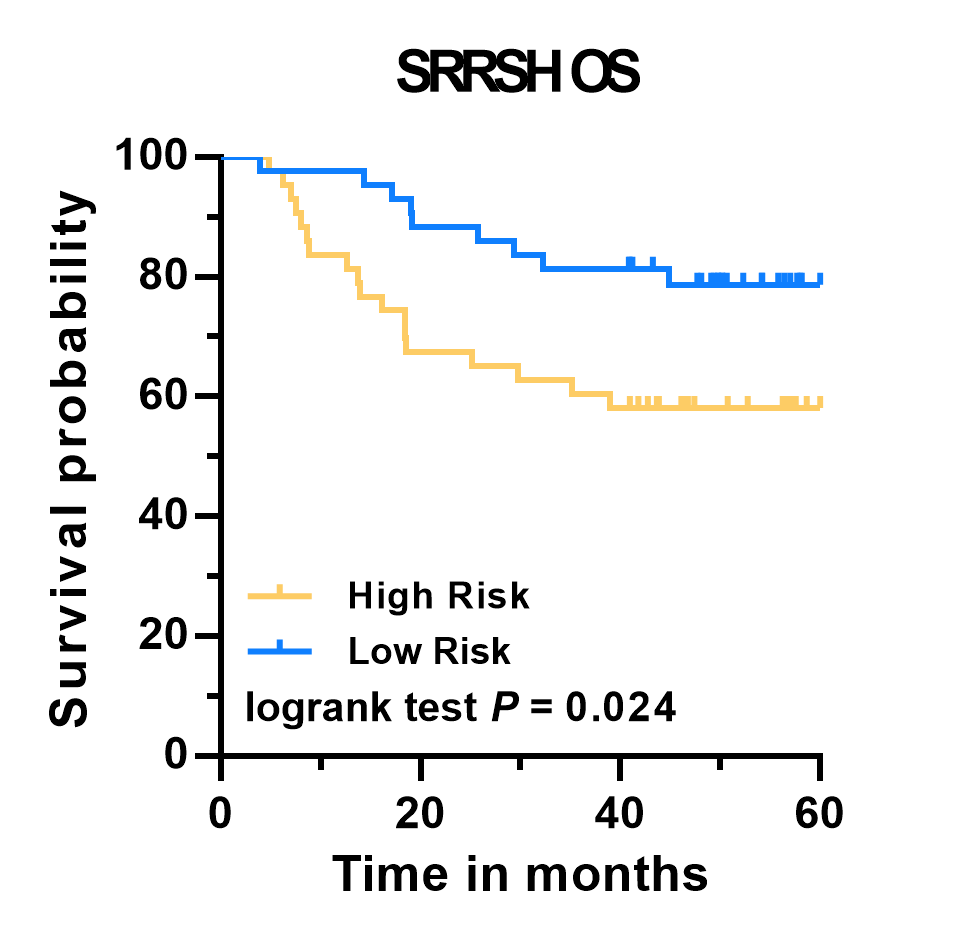

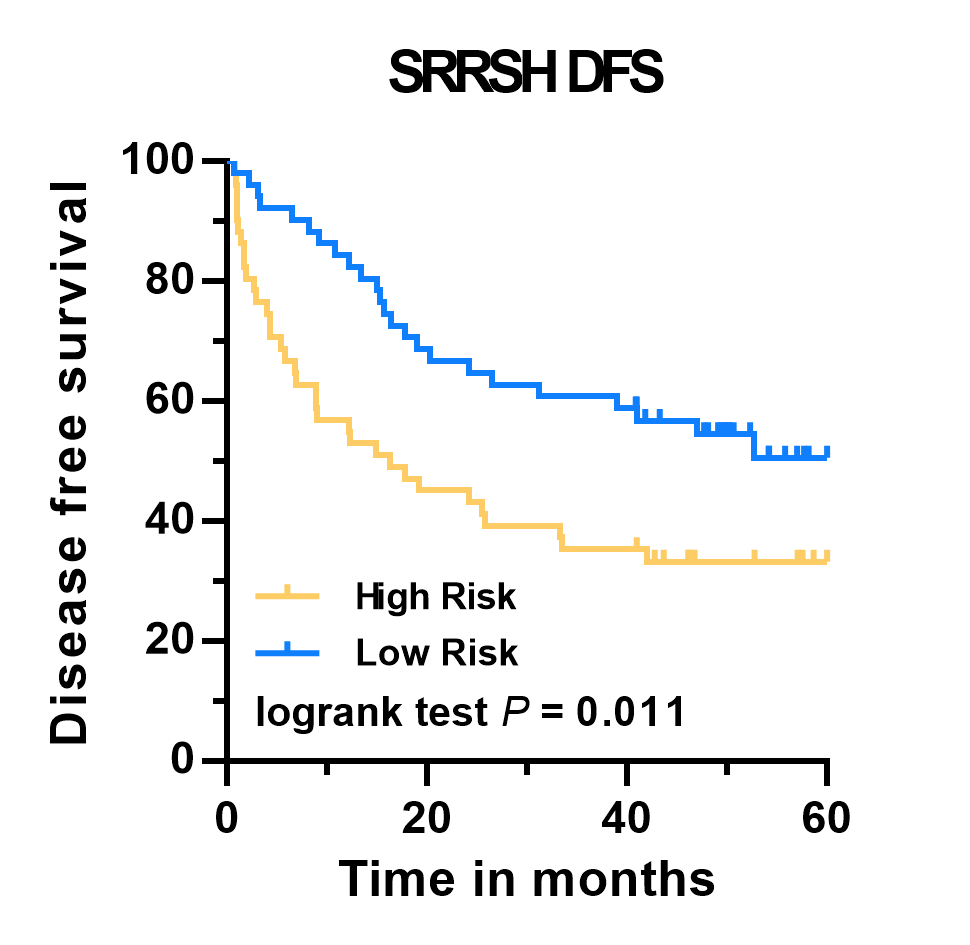
 **Supplementary Figure 10.** Kaplan-Meier curves of survival probability and disease free survival in all SRRSH cohort patients with HCC based on risk score.

**Supplementary Table 1. Sequences of the primers for Real-Time Reverse Transcription Polymerase Chain Reaction (qRT-PCR).**

| **Gene** |  | **Sequence** |
| --- | --- | --- |
| GAPDH | Forward: | 5′-CATCACTGCCACCCAGAAGACTG-3′ |
|  | Reverse: | 5′-ATGCCAGTGAGCTTCCCGTTCAG-3′ |
| ADAM9 | Forward: | 5′-TCCATTGCTCTTAGCGACTGT-3′ |
|  | Reverse: | 5′-GGGGTTCAATCCCATAACTCG-3′ |
| SP1 | Forward: | 5′-TGGCAGCAGTACCAATGGC-3′ |
|  | Reverse: | 5′-CCAGGTAGTCCTGTCAGAACTT-3′ |
| TP53 | Forward: | 5′-CAGCACATGACGGAGGTTGT-3′ |
|  | Reverse: | 5′-TCATCCAAATACTCCACACGC-3′ |
